# Supplementary material for: Molecular encoding and synaptic decoding of context during salt chemotaxis in C. elegans
Source: PubMed Central journal article supplement (PMC9142520; doi:10.1038/s41467-022-30279-7), 2022-05-27
Supplement: 41467_2022_30279_MOESM3_ESM.pdf [file 41467_2022_30279_MOESM3_ESM.pdf]

Description of Additional Supplementary Files:

File Name:

**Supplemental Data S1\_PKC-1\_TurboID\_phosphoproteome**

Description: The summary data of phosphoproteomic analysis using TurboID in Fig.2

File Name:

**Supplemental Data S2\_PKC-1\_TurboID\_total\_proteome.xlsx**

Description:

The summary data of proteomic(non-phospho-enriched) analysis using TurboID.
